# Supplementary material
Source: Springer Nature journal article supplement (https://www.springermedizin.de/resource/supplementary/12933_2012_493_MOESM2_ESM.pdf/9538602)

Figure 1

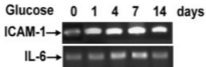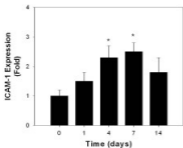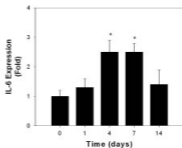

Supplement: MOESM2 [file 9538602]
